# Supplementary material for: From zero-dimensional metallomacrocycle to three-dimensional metal–organic frameworks mediated by solvent polarity: near-white light emissions and gas adsorption properties
Source: Royal Society of Chemistry journal article supplement (doi:10.1039/d3ce00476g), 2023-01-01
Supplement: d3ce00476g1.pdf [file d3ce00476g1.pdf]

# Electronic Supplementary Information

## From zero-dimensional metallomacrocycle to three-dimensional metal–organic frameworks mediated by solvent polarity: Near-white light emissions and gas adsorption properties

Jia-Ling Yin,<sup>a</sup> Qing-Qing Yan,<sup>a</sup> Yu-Xin Liu<sup>b</sup> and Guo-Ping Yong<sup>\*a</sup>

<sup>a</sup> Department of Chemistry, University of Science and Technology of China, Hefei 230026, P. R. China. E-mail: gpyong@ustc.edu.cn

<sup>b</sup> Technology Center of Hefei Customs, and Anhui Province Key Laboratory of Analysis and Detection for Food Safety, Hefei, 230022, P. R. China.

**Table S1** Selected bond distances (Å) and angles (°) for **1**, **2** and **6**.<sup>a</sup>

| <b>1</b>        |            | <b>2</b>            |            | <b>6</b>           |            |
|-----------------|------------|---------------------|------------|--------------------|------------|
| Mn(1)-O(1)      | 2.103(4)   | Mn(1)-O(1)          | 2.106(4)   | Zn(1)-O(1)         | 1.915(2)   |
| Mn(1)-O(3)      | 2.103(4)   | Mn(1)-O(3)#4        | 2.108(5)   | Zn(1)-O(6)#3       | 1.937(2)   |
| Mn(1)-O(5)      | 2.196(4)   | Mn(1)-N(1)          | 2.332(5)   | Zn(1)-O(9)         | 2.023(3)   |
| Mn(1)-O(6)      | 2.162(4)   | Mn(1)-N(2)#3        | 2.244(6)   | Zn(1)-O(10)        | 1.964(3)   |
| Mn(1)-N(1)      | 2.351(5)   | Mn(1)-N(3)#4        | 2.349(6)   | Zn(2)-O(4)#2       | 2.000(5)   |
| Mn(1)-N(2)      | 2.373(5)   | Mn(1)-N(4)#2        | 2.224(6)   | Zn(2)-O(7)         | 1.908(3)   |
| Mn(2)-O(7)      | 2.110(4)   | O(1)-Mn(1)-O(3)#4   | 178.08(19) | Zn(2)-O(11)        | 1.920(4)   |
| Mn(2)-O(9)      | 2.114(4)   | O(1)-Mn(1)-N(1)     | 74.58(19)  | O(1)-Zn(1)-O(6)#3  | 125.33(10) |
| Mn(2)-O(11)     | 2.138(4)   | O(1)-Mn(1)-N(2)#3   | 91.55(19)  | O(1)-Zn(1)-O(9)    | 95.97(11)  |
| Mn(2)-O(12)     | 2.175(4)   | O(1)-Mn(1)-N(3)#4   | 104.66(19) | O(1)-Zn(1)-O(10)   | 109.94(12) |
| Mn(2)-N(3)      | 2.435(5)   | O(1)-Mn(1)-N(4)#2   | 89.22(19)  | O(6)#3-Zn(1)-O(9)  | 103.06(10) |
| Mn(2)-N(4)      | 2.357(4)   | O(3)#4-Mn(1)-N(1)   | 103.6(2)   | O(6)#3-Zn(1)-O(10) | 115.13(11) |
| O(1)-Mn(1)-O(3) | 167.30(16) | O(3)#4-Mn(1)-N(2)#3 | 89.31(19)  | O(9)-Zn(1)-O(10)   | 102.07(11) |
| O(1)-Mn(1)-O(5) | 82.27(14)  | O(3)#4-Mn(1)-N(3)#4 | 74.30(18)  | O(4)#2-Zn(2)-O(7)  | 140.9(2)   |
| O(1)-Mn(1)-O(6) | 95.12(18)  | O(3)#4-Mn(1)-N(4)#2 | 92.6(2)    | O(4)#2-Zn(2)-O(11) | 89.9(2)    |
| O(1)-Mn(1)-N(1) | 73.44(15)  | N(1)-Mn(1)-N(2)#3   | 100.1(2)   | O(7)-Zn(2)-O(11)   | 102.4(2)   |
| O(1)-Mn(1)-N(2) | 110.67(18) | N(1)-Mn(1)-N(3)#4   | 79.0(2)    |                    |            |
| O(3)-Mn(1)-O(5) | 85.07(15)  | N(1)-Mn(1)-N(4)#2   | 163.4(2)   |                    |            |
| O(3)-Mn(1)-O(6) | 85.68(15)  | N(2)#3-Mn(1)-N(3)#4 | 162.7(2)   |                    |            |
| O(3)-Mn(1)-N(1) | 119.26(16) | N(2)#3-Mn(1)-N(4)#2 | 83.8(2)    |                    |            |

|                  |            |                     |          |
|------------------|------------|---------------------|----------|
| O(3)-Mn(1)-N(2)  | 72.85(15)  | N(3)#4-Mn(1)-N(4)#2 | 102.0(2) |
| O(5)-Mn(1)-O(6)  | 88.87(15)  |                     |          |
| O(5)-Mn(1)-N(1)  | 155.42(15) |                     |          |
| O(5)-Mn(1)-N(2)  | 110.28(17) |                     |          |
| O(6)-Mn(1)-N(1)  | 89.53(16)  |                     |          |
| O(6)-Mn(1)-N(2)  | 149.28(16) |                     |          |
| N(1)-Mn(1)-N(2)  | 82.47(17)  |                     |          |
| O(7)-Mn(2)-O(9)  | 172.33(16) |                     |          |
| O(7)-Mn(2)-O(11) | 84.97(15)  |                     |          |
| O(7)-Mn(2)-O(12) | 85.86(16)  |                     |          |
| O(7)-Mn(2)-N(3)  | 72.75(15)  |                     |          |
| O(7)-Mn(2)-N(4)  | 112.40(16) |                     |          |
| O(9)-Mn(2)-O(11) | 90.96(16)  |                     |          |
| O(9)-Mn(2)-O(12) | 88.25(15)  |                     |          |
| O(9)-Mn(2)-N(3)  | 112.82(16) |                     |          |
| O(9)-Mn(2)-N(4)  | 74.38(14)  |                     |          |
| O(11)-Mn(2)-     | 97.82(17)  |                     |          |
| O(12)            | 152.87(15) |                     |          |
| O(11)-Mn(2)-N(3) | 94.85(16)  |                     |          |
| O(11)-Mn(2)-N(4) | 95.85(17)  |                     |          |
| O(12)-Mn(2)-N(3) | 158.65(15) |                     |          |
| O(12)-Mn(2)-N(4) | 80.07(16)  |                     |          |
| N(3)-Mn(2)-N(4)  |            |                     |          |

<sup>a</sup> Symmetry code for **2**: #2= -x, y+1/2, -z+1/2, #3=-x, -y, -z, #4=x, -y-1/2, z-1/2;  
symmetry code for **6**: #2= -x, y+1/2, -z+1/2, #3= -x, -y, -z.

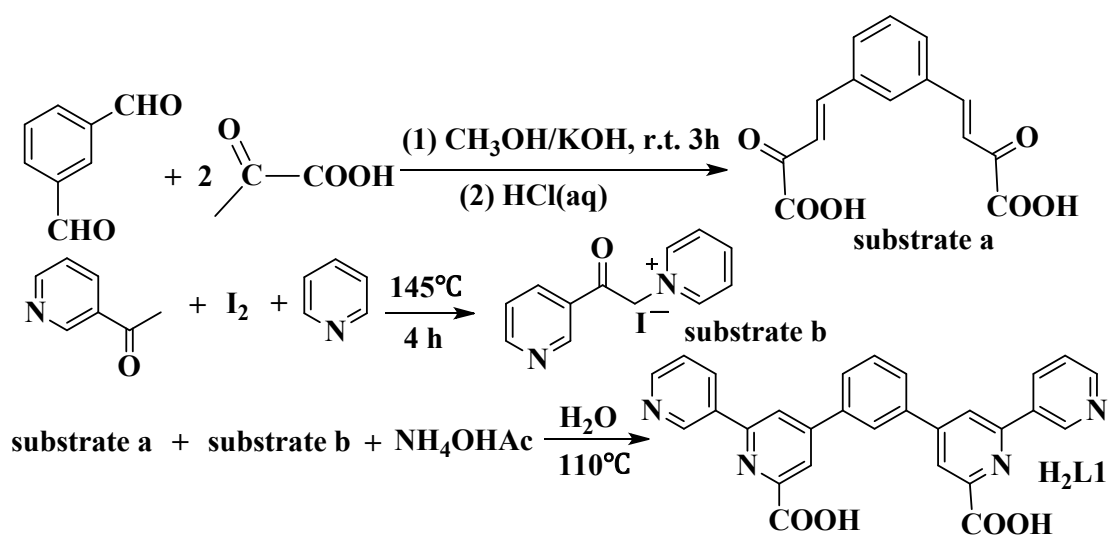

**Scheme S1** The synthesis procedure for H<sub>2</sub>L1 ligand.

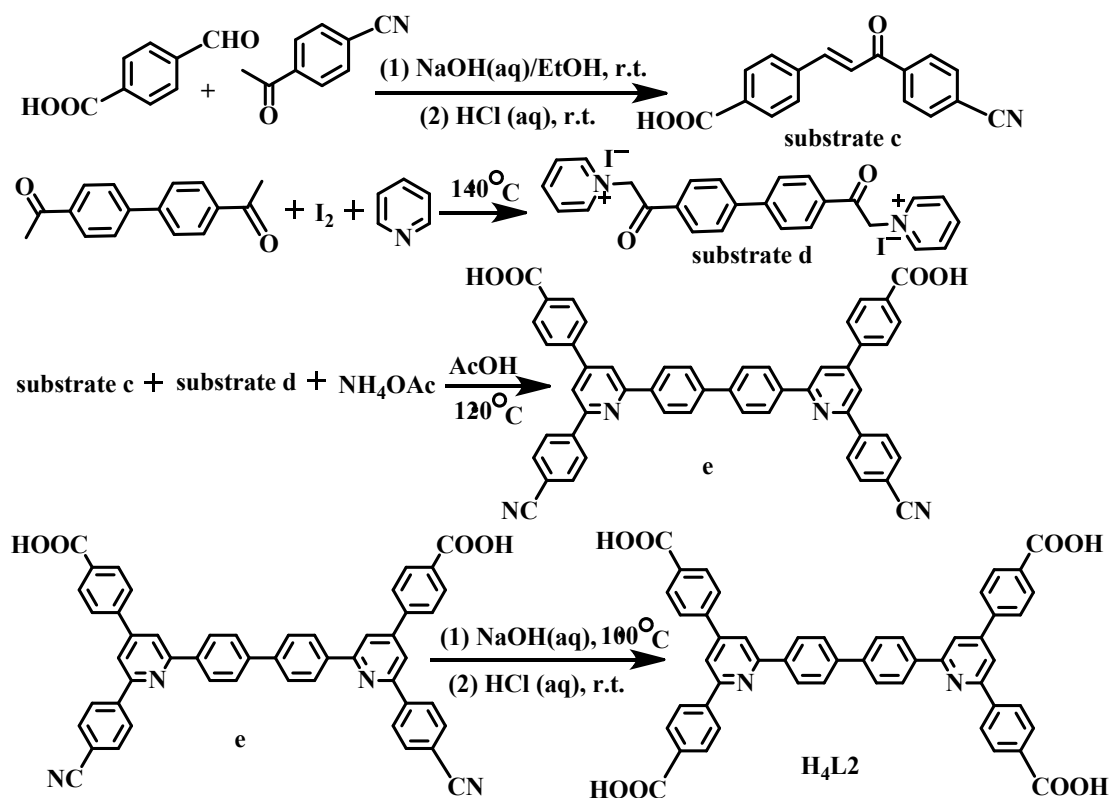

**Scheme S2** The synthesis procedure for H<sub>4</sub>L<sub>2</sub> ligand.

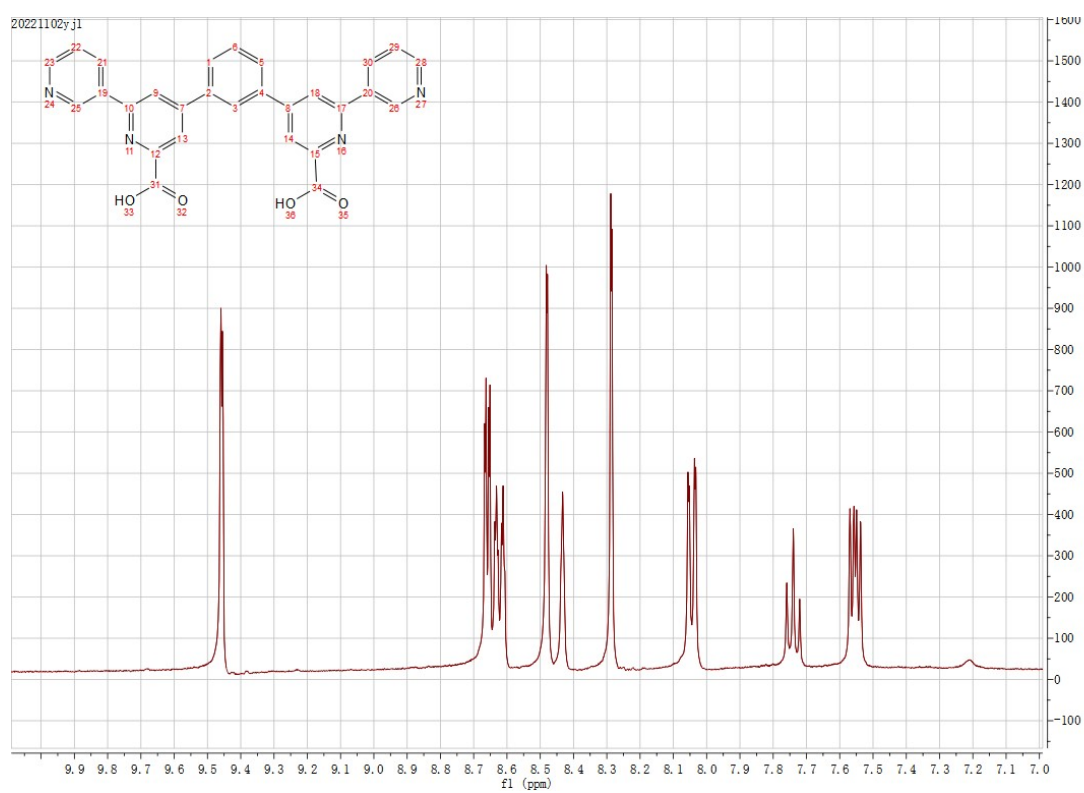

**Fig. S1** <sup>1</sup>H NMR (400 MHz, dms0-*d*<sub>6</sub>) of H<sub>2</sub>L<sub>1</sub> ligand.

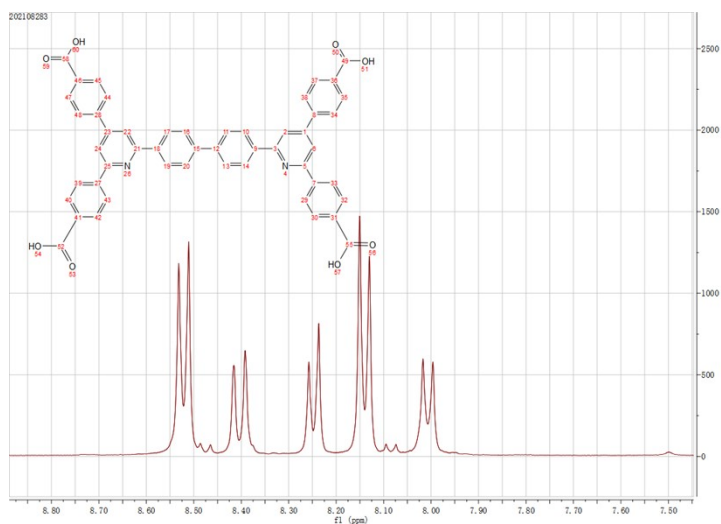

**Fig. S2**  $^1\text{H}$  NMR (400 MHz,  $\text{dmsol-}d_6$ ) of  $\text{H}_4\text{L}_2$  ligand.

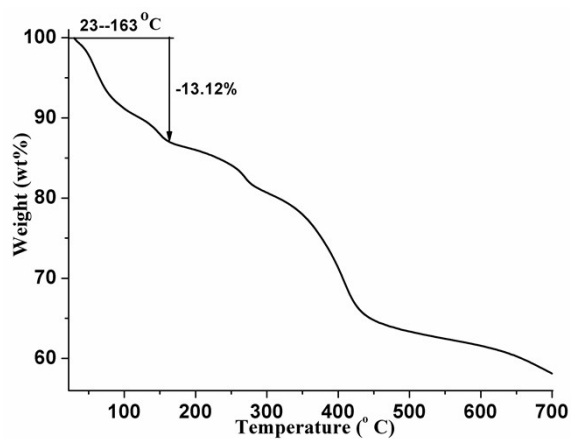

**Fig. S3** TGA curve of **1**.

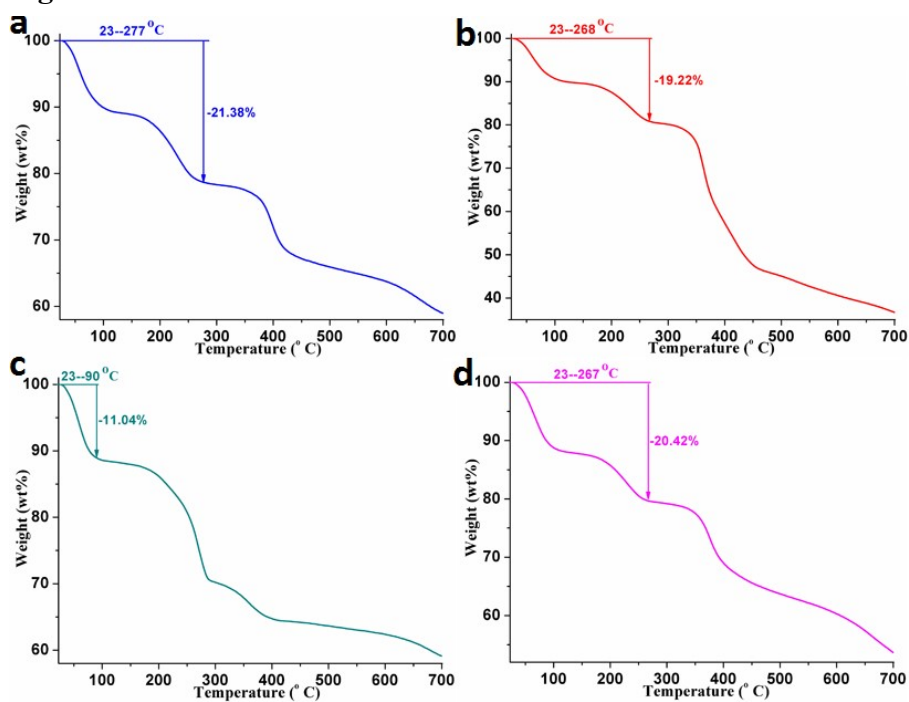

**Fig. S4** TGA curves of **2** (a), **3** (b), **4** (c) and **5** (d).

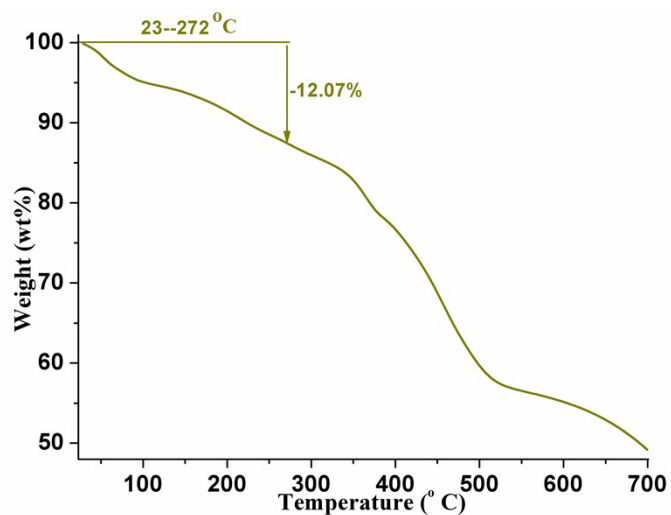

Fig. S5 TGA curve of 6.

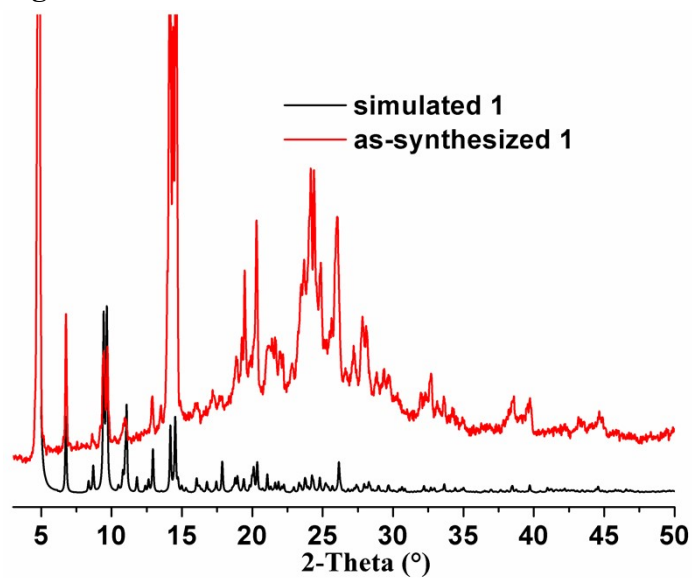

Fig. S6 Powder XRD profiles of 1.

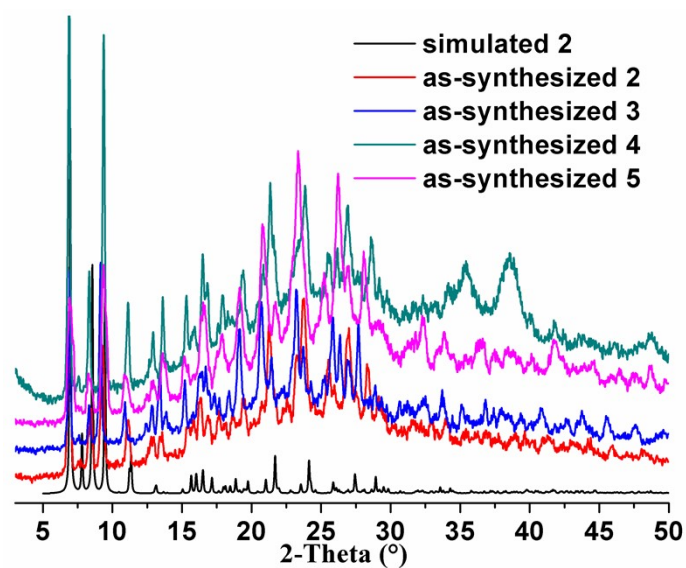

Fig. S7 Powder XRD profiles of 2-5.

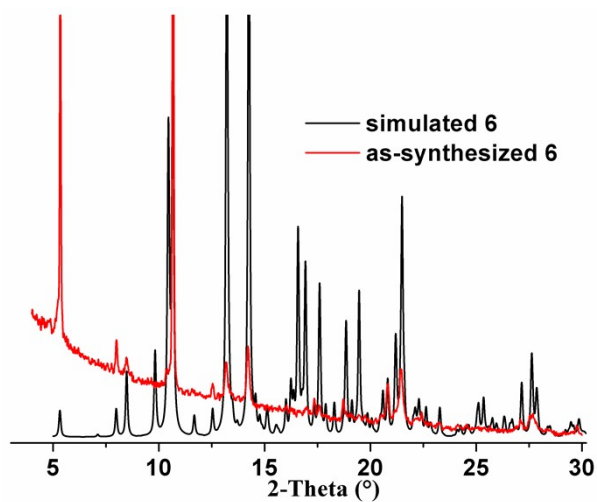

**Fig. S8** Powder XRD profiles of **6**.

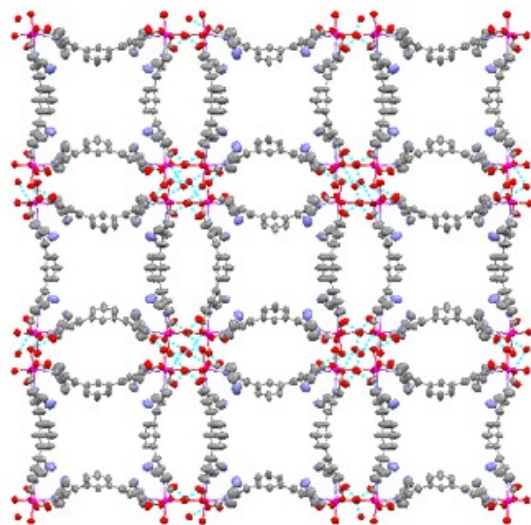

**Fig. S9** 2D supramolecular network of **1**.

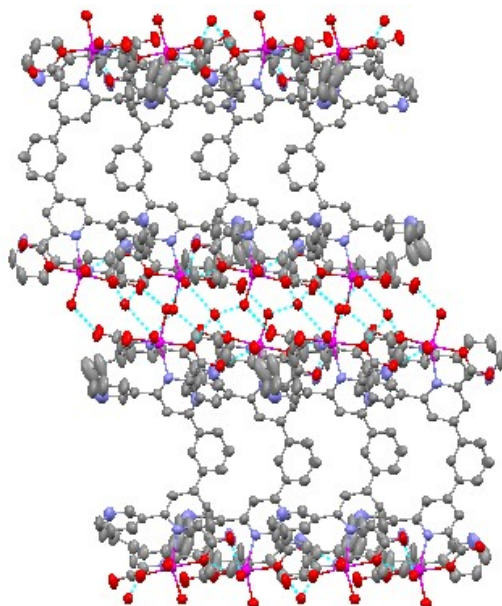

**Fig. S10** The 3D supramolecular structure of **1** assembled by the antiparallel A-A packing mode.

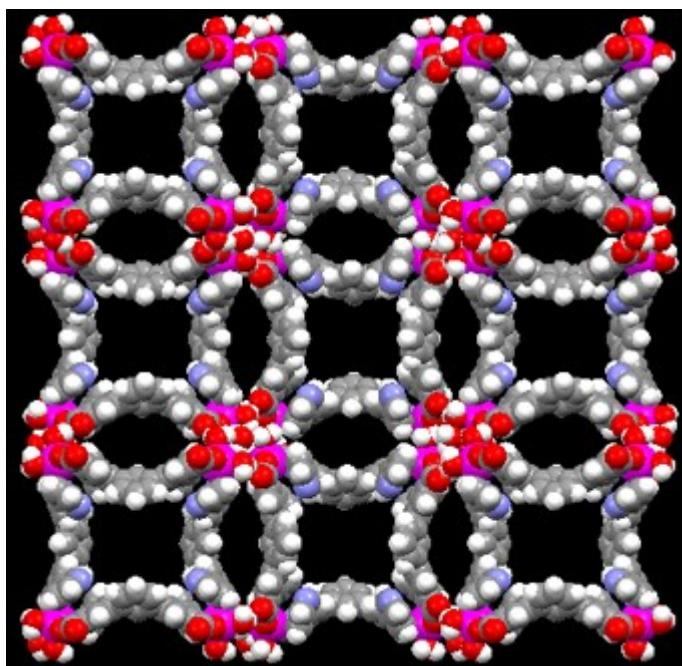

**Fig. S11** Space-filling representation, showing guest-free channels including orthogon nanoscale channels in **1**.

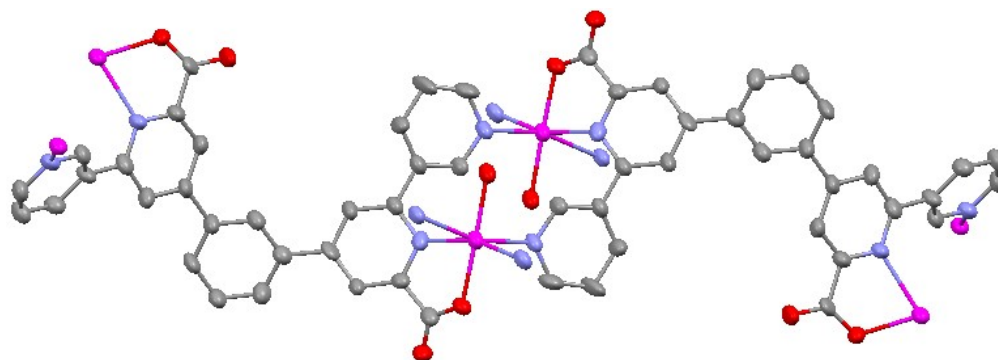

**Fig. S12** The rhombus binuclear SBU in **2**.

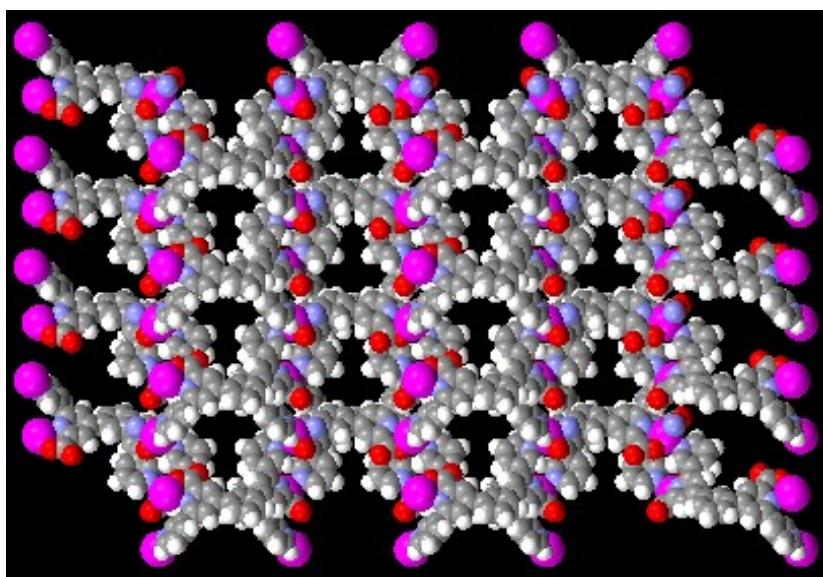

**Fig. S13** Space-filling representation, showing guest-free “T-shaped” channels in **2**.

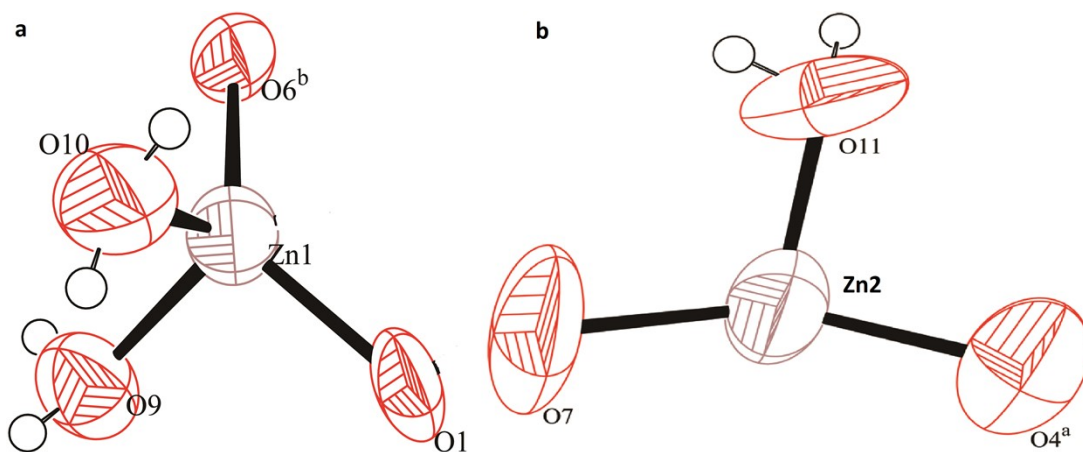

**Fig. S14** ORTEP diagram showing coordination environment of Zn1 (a) and Zn2 (b) centers in **6** by thermal vibration ellipsoids with a 50% probability level. Symmetry code:  $a = -x, y+1/2, -z+1/2$ ,  $b = -x, -y, -z$ .

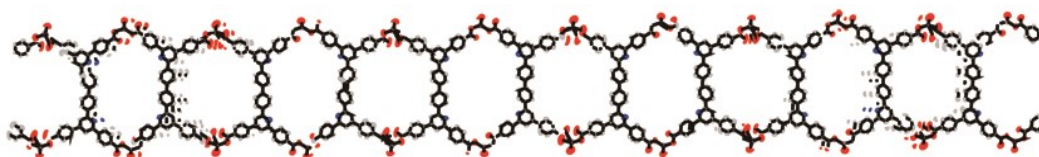

**Fig. S15** Open channels in **6** along the *b* axis.

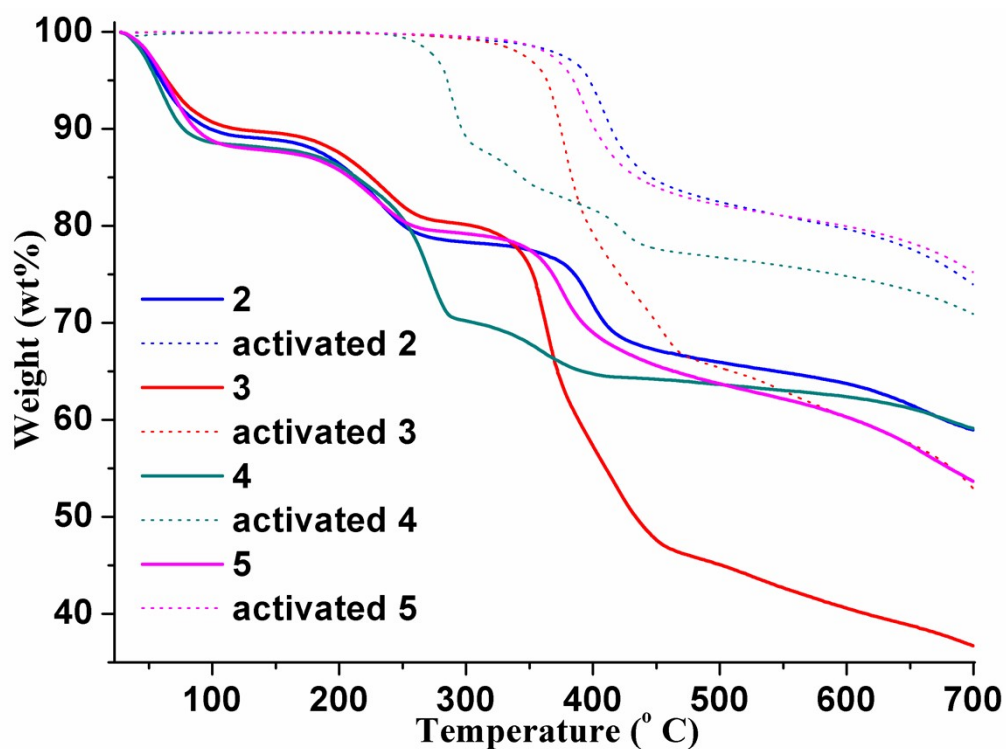

**Fig. S16** TGA curves of **2**–**5** (solid lines), and activated **2**–**5** (dot lines).



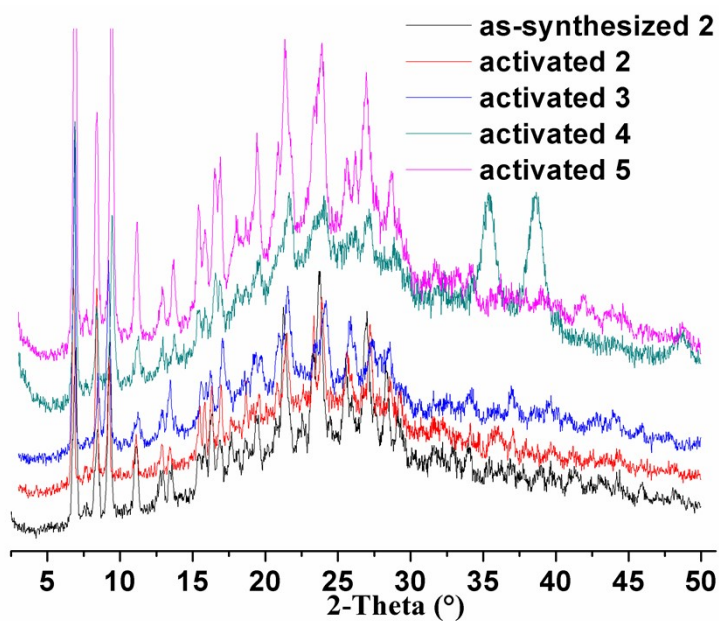

Fig. S17 Powder XRD profiles of as-synthesized **2** and activated **2**–**5**.

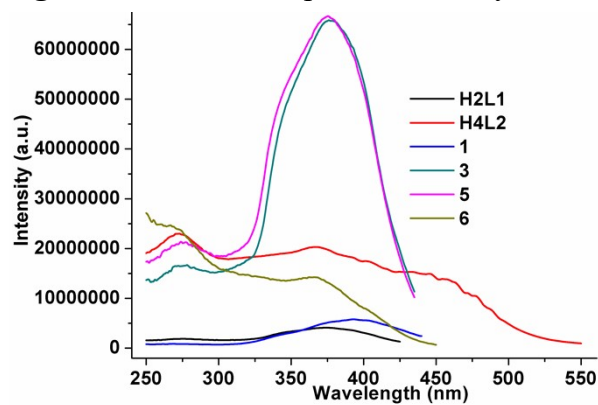

Fig. S18 Solid-state excitation spectra of H<sub>2</sub>L1 and H<sub>4</sub>L2 ligand and **1**, **3**, **5** and **6**.

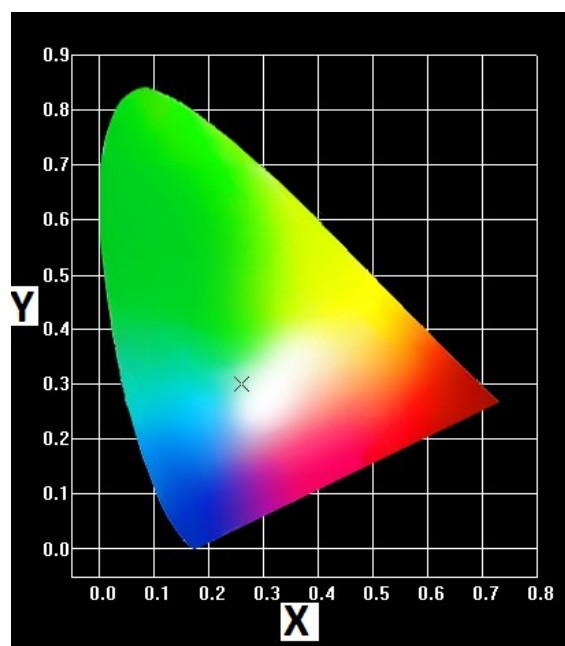

Fig. S19 CIE chromaticity diagram for **1** upon excitation at 365 nm.

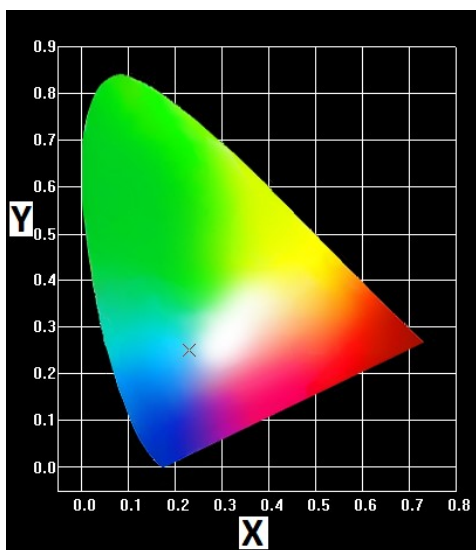

**Fig. S20** CIE chromaticity diagram for **3** upon excitation at 365 nm.

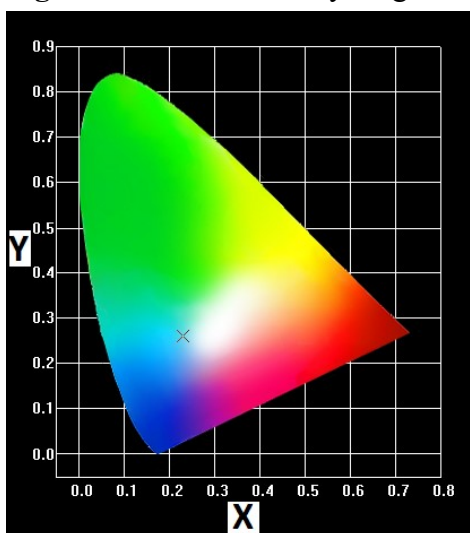

**Fig. S21** CIE chromaticity diagram for **5** upon excitation at 365 nm.

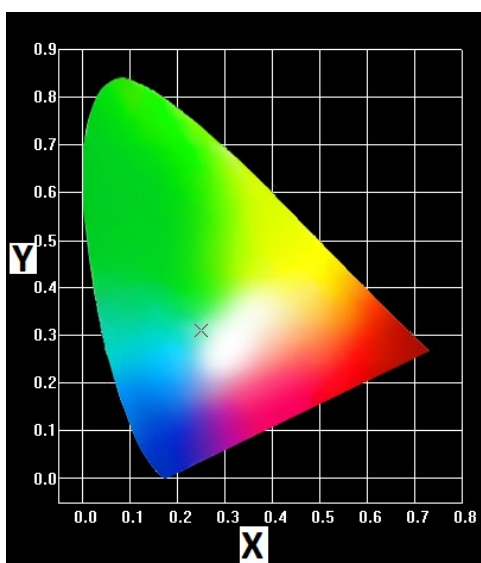

**Fig. S22** CIE chromaticity diagram for activated **3** upon excitation at 365 nm.

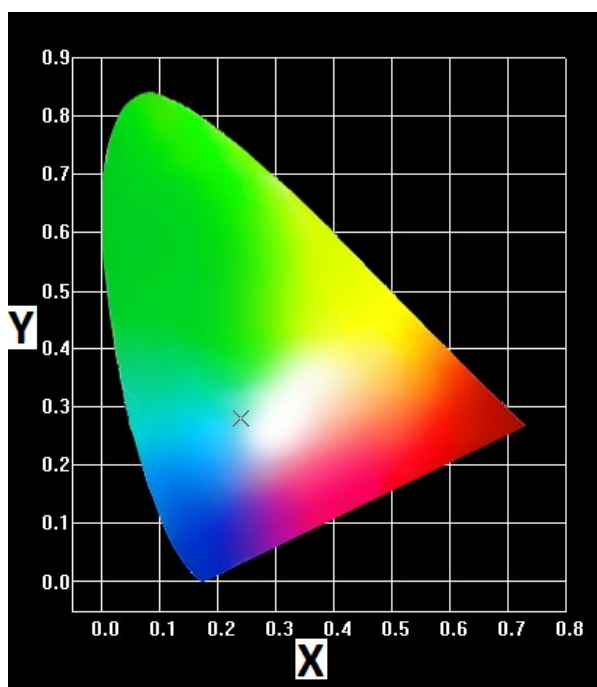

**Fig. S23** CIE chromaticity diagram for activated **5** upon excitation at 365 nm.

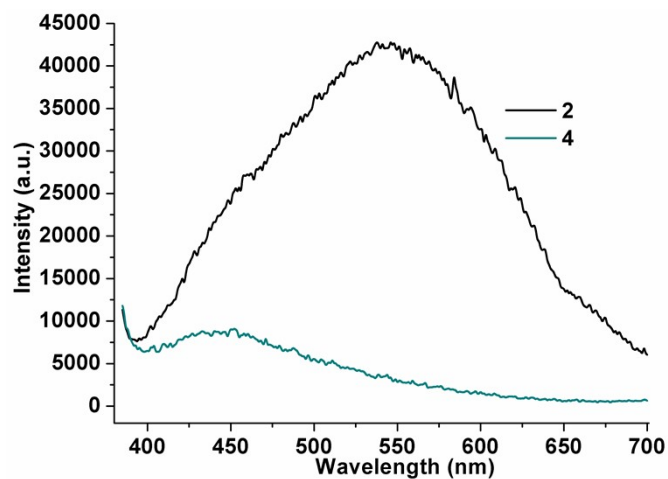

**Fig. S24** PL spectra of 3D MOFs **2** and **4**.

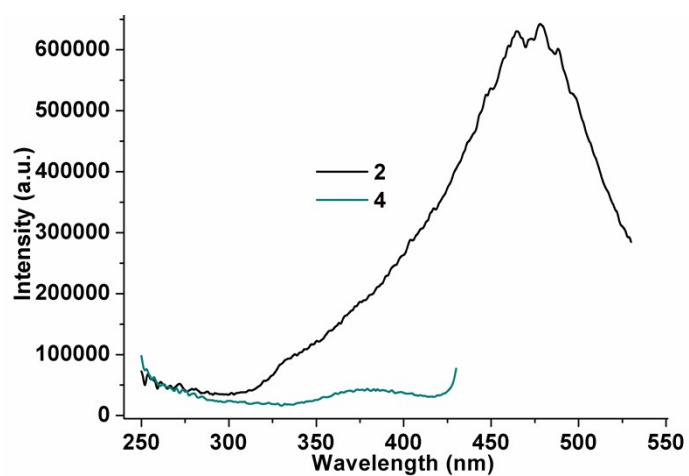

**Fig. S25** Solid-state excitation spectra of 3D MOFs **2** and **4**.

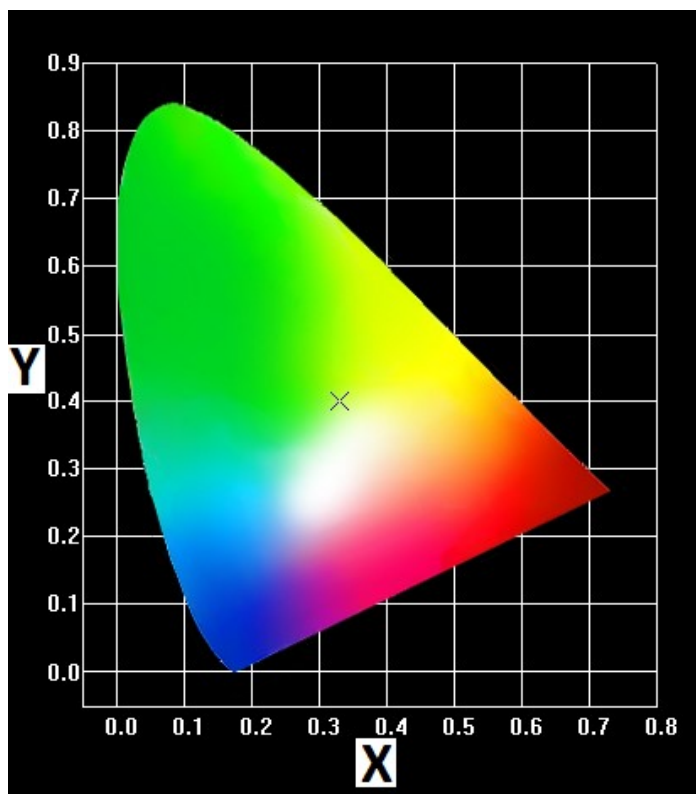

**Fig. S26** CIE chromaticity diagram for **6** upon excitation at 365 nm.
